# Supplementary material for: miR-1293 acts as a tumor promotor in lung adenocarcinoma via targeting phosphoglucomutase 5
Source: PeerJ. 2021 Sep 16;9:e12140. doi: 10.7717/peerj.12140 (PMC8450003; doi:10.7717/peerj.12140)
Supplement: Supplemental Information 3 [file peerj-09-12140-s003.xlsx]

## Sheet: Sheet1
Fig 1H	BEAS-2B	A549	H1299	H1975	H226
	1.08	2.35	3.56	2.31	1.26
	1	1.98	3.85	2.08	1.38
	0.92	2.27	3.18	2.74	1.04
Fig 2A	NC mimic			miR-1293 mimic			anti-NC			anti-miR-1293
0	0.2	0.23	0.16	0.21	0.17	0.22	0.18	0.2	0.21	0.15	0.18	0.21
24	0.35	0.32	0.29	0.45	0.39	0.48	0.3	0.38	0.33	0.2	0.25	0.3
48	0.56	0.53	0.51	0.78	0.67	0.8	0.5	0.59	0.54	0.34	0.31	0.37
72	0.68	0.72	0.66	1.02	0.9	0.98	0.65	0.76	0.7	0.48	0.42	0.38
Fig 2B	NC mimic			miR-1293 mimic			anti-NC			anti-miR-1293
0	0.25	0.23	0.28	0.21	0.26	0.27	0.22	0.23	0.3	0.21	0.24	0.28
24	0.41	0.43	0.37	0.58	0.49	0.53	0.46	0.4	0.39	0.3	0.32	0.37
48	0.69	0.58	0.64	0.86	0.79	0.9	0.55	0.61	0.65	0.45	0.38	0.43
72	0.79	0.82	0.75	1.12	1.08	0.98	0.76	0.85	0.84	0.58	0.5	0.53
Fig 2C	NC mimic			miR-1293 mimic			anti-NC			anti-miR-1293
H1975	75	70	78	110	128	105	82	73	86	50	43	52
H1299	130	120	145	210	238	203	115	130	138	80	65	83
Fig 2D	NC mimic			miR-1293 mimic			anti-NC			anti-miR-1293
H1975	60	65	57	90	98	86	55	59	50	15	23	18
H1299	82	93	90	140	155	132	93	96	82	55	51	62
Fig 2F	NC mimic			miR-1293 mimic			anti-NC			anti-miR-1293
MMP2	1	0.97	1.03	2.6	2.5	2.24	1.2	1	1.14	0.24	0.2	0.26
MMP9	1.1	0.96	0.94	1.95	2.13	2.06	0.9	0.98	0.87	0.15	0.12	0.18
Fig 2G	NC mimic			miR-1293 mimic			anti-NC			anti-miR-1293
MMP2	1.05	1.02	0.93	2.58	2.65	3.12	1.06	0.95	0.89	0.26	0.34	0.3
MMP9	1.02	1.03	0.95	3.67	3.59	3.05	1.04	1.17	0.95	0.12	0.07	0.16
Fig 3E	BEAS-2B	A549	H1299	H1975
	1.05	0.56	0.31	0.54
	1.02	0.63	0.24	0.43
	0.93	0.72	0.4	0.51
Fig 3F	BEAS-2B	A549	H1299	H1975
	1.05	0.53	0.12	0.3
	1.04	0.46	0.1	0.34
	0.91	0.67	0.15	0.28
Fig 4B	NC mimic			miR-1293 mimic
PGM5-WT	1.06	1.02	0.92	0.29	0.35	0.41
PGM5-MUT	1.05	1.1	0.93	0.86	0.99	1.12
Fig 4C	NC mimic			miR-1293 mimic
H1975	1.05	1	0.95	0.56	0.45	0.6
H1299	1.04	0.93	1.03	0.34	0.42	0.31
Fig 4E	NC mimic			miR-1293 mimic
H1975	1	0.93	1.07	0.35	0.32	0.27
H1299	1.03	1.08	0.89	0.12	0.18	0.08
Fig 5A	pcDNA3.1	PGM5
	1	4.56
	1.03	5.61
	0.97	5.29
Fig 5B	NC mimic			miR-1293 mimic			pcDNA3.1			PGM5			miR-1293+pcDNA3.1			miR-1293+PGM5
0	0.18	0.23	0.2	0.24	0.16	0.2	0.15	0.24	0.21	0.23	0.2	0.17	0.15	0.19	0.23	0.24	0.21	0.18
24	0.41	0.43	0.35	0.59	0.5	0.53	0.45	0.36	0.38	0.3	0.23	0.28	0.6	0.48	0.53	0.4	0.38	0.45
48	0.66	0.55	0.64	0.86	0.79	0.95	0.69	0.67	0.57	0.41	0.3	0.34	0.86	0.73	0.88	0.7	0.66	0.58
72	0.79	0.83	0.75	1.2	1.13	1.06	0.74	0.79	0.86	0.45	0.5	0.51	1.25	1.07	1.18	0.86	0.79	0.88
Fig 5D	NC mimic			miR-1293 mimic			pcDNA3.1			PGM5			miR-1293+pcDNA3.1			miR-1293+PGM5
migration	90	95	106	221	205	196	112	103	94	65	53	70	200	186	219	145	134	120
invasion	80	76	84	136	152	140	85	69	79	40	36	46	158	149	132	102	108	90
Fig 5F	NC mimic			miR-1293 mimic			pcDNA3.1			PGM5			miR-1293+pcDNA3.1			miR-1293+PGM5
	1.03	1.04	0.93	3.59	3.86	3.34	1.12	1.23	0.94	0.25	0.26	0.34	3.2	3.49	3.8	1.68	1.95	1.82
	1.05	1.04	0.91	3.16	2.95	2.73	1.15	0.95	1.04	0.15	0.23	0.2	3.37	2.8	3.04	1.3	1.51	1.43
Fig 6A	anti-miR-1293	anti-NC		Fig 6B	anti-miR-1293	anti-NC
	0.25	1.14			3.35	1.05
	0.35	1.28			4.12	1.1
	0.41	0.88			3.45	1.02
	0.56	0.96			3.69	0.95
	0.3	0.86			3.86	0.97
	0.45	0.88			3.97	0.91
Fig 6D		anti-miR-1293						anti-NC
	7	100	80	68	93	57	104	102	96	81	73	62	68
	14	203	105	116	165	182	173	352	456	468	356	490	387
	21	298	345	329	294	207	273	659	798	602	654	692	595
	28	402	452	405	306	359	385	955	1015	942	906	795	853
	35	389	541	500	435	406	475	1100	1192	1056	932	1035	989
